# Supplementary material for: AMS and LC/MS analyses of SOA from the photooxidation of benzene and 1,3,5-trimethylbenzene in the presence of NO x : effects of chemical structure on SOA aging
Source: Copernicus journal article supplement (doi:10.5194/acp-12-4667-2012), 2012-05-25
Supplement: Supplementary file [file acp-12-4667-2012-supplement.pdf]

**Supplement for “AMS and LC/MS analyses of SOA from the photooxidation of benzene and 1,3,5-trimethylbenzene in the presence of NO<sub>x</sub>: Effects of chemical structure on SOA aging” by K. Sato et al.**

**K. Sato<sup>1</sup>, A. Takami<sup>1</sup>, Y. Kato<sup>1,\*</sup>, T. Seta<sup>1</sup>, Y. Fujitani<sup>1</sup>, T. Hikida<sup>2</sup>, A. Shimono<sup>2</sup>, and T. Imamura<sup>1</sup>**

<sup>1</sup>National Institute for Environmental Studies, 16-2 Onogawa, Tsukuba, Ibaraki 305-8506, Japan

<sup>2</sup>Shoreline Science Research Inc., 3-12-7, Owada-machi, Hachioji, Tokyo 192-0045, Japan

\* currently at: Nuclear Material Control Center, 1-28-9 Higashi-Ueno, Taito, Tokyo 110-0015, Japan

Correspondence to: K. Sato (kei@nies.go.jp)

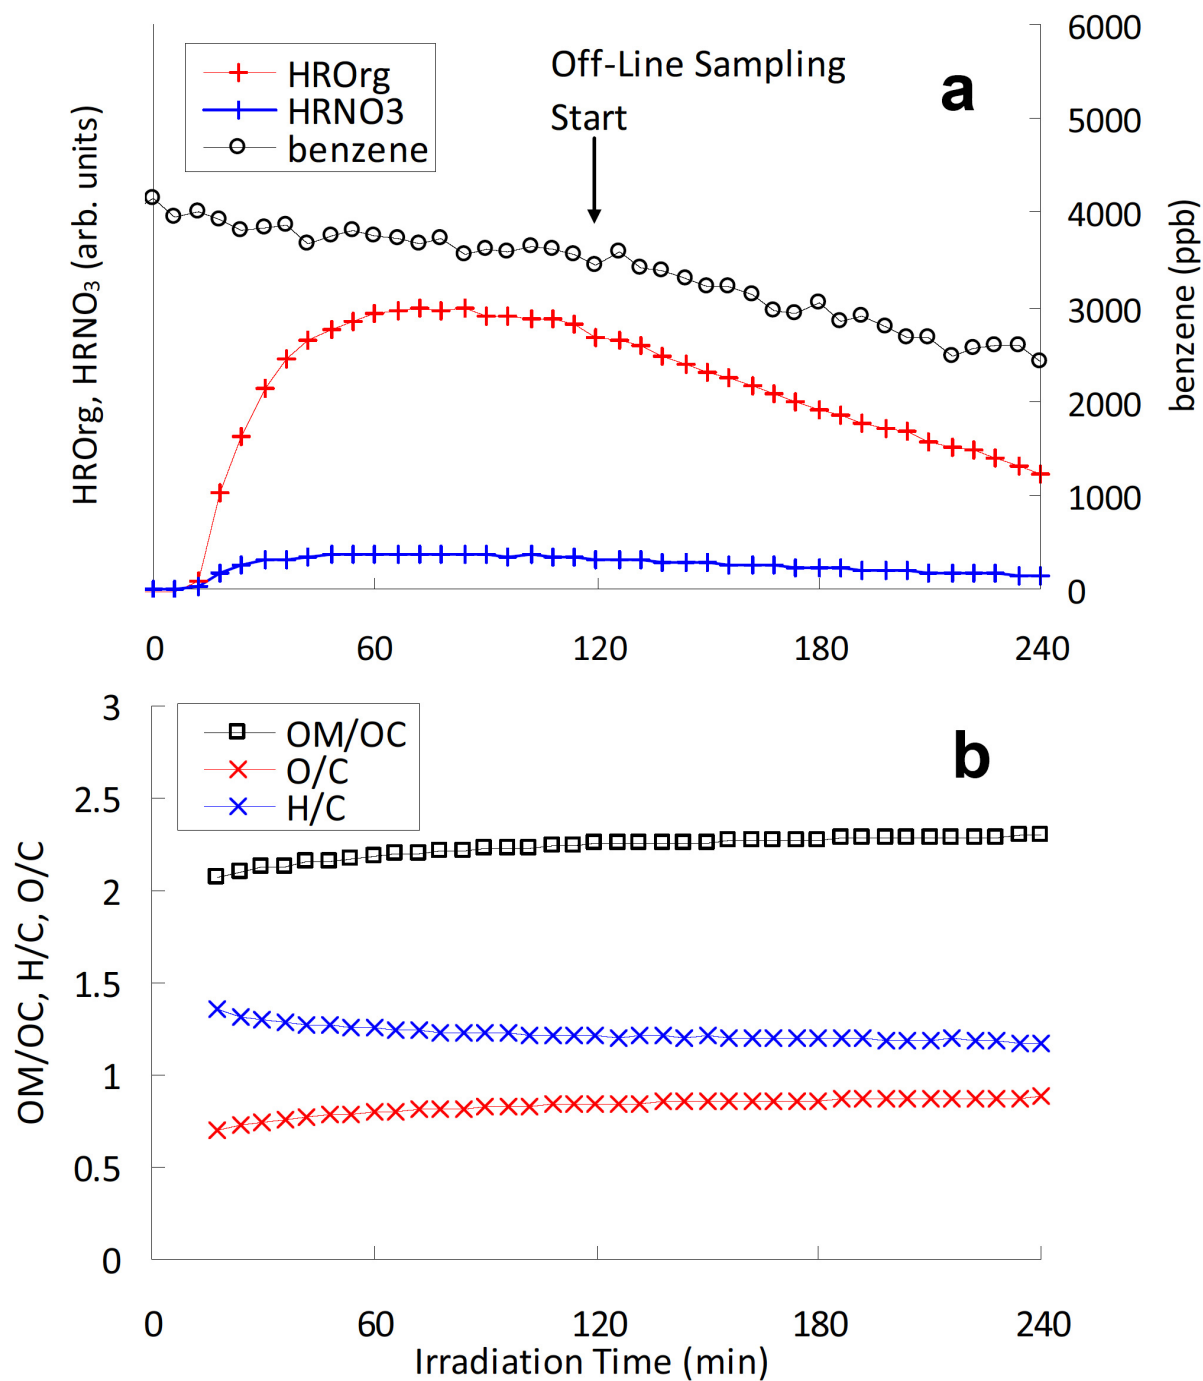

Fig. S1: Time profiles (a) benzene concentration and HROrg and HRNO<sub>3</sub> particulate product concentrations and (b) OM/OC (mass ratio of organic matter to organic carbon), H/C, and O/C ratios measured during the photooxidation of benzene (run 3).

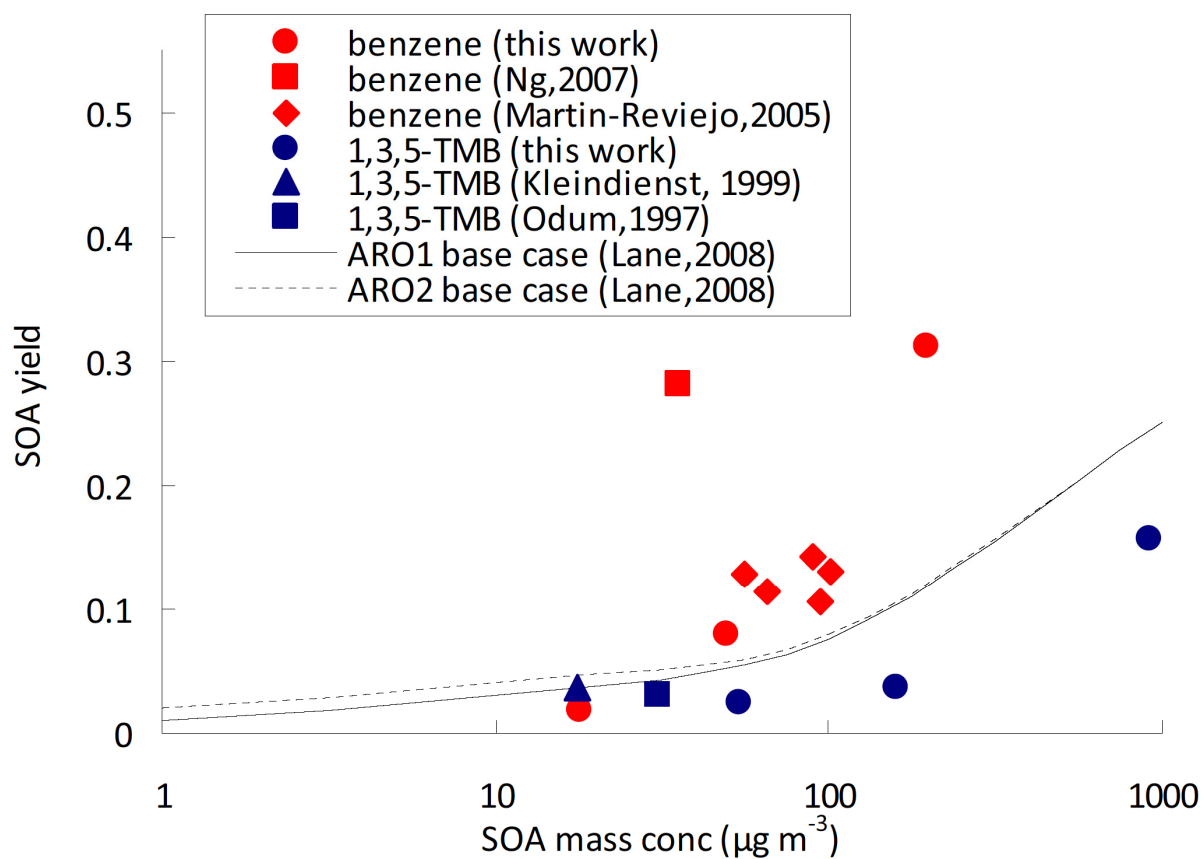

Fig. S2. Yield curves for SOA formed from the photooxidation of aromatic hydrocarbons under high  $\text{NO}_x$  conditions; symbols are present and previous experimental results; solid and dotted curves are SOA yield curves for aromatic compounds calculated by volatility basis-set approach (Lane et al., 2008). All experimental data plotted are measured at room temperatures (297-304 K) and dry conditions ( $\text{RH} < 28\%$ ).

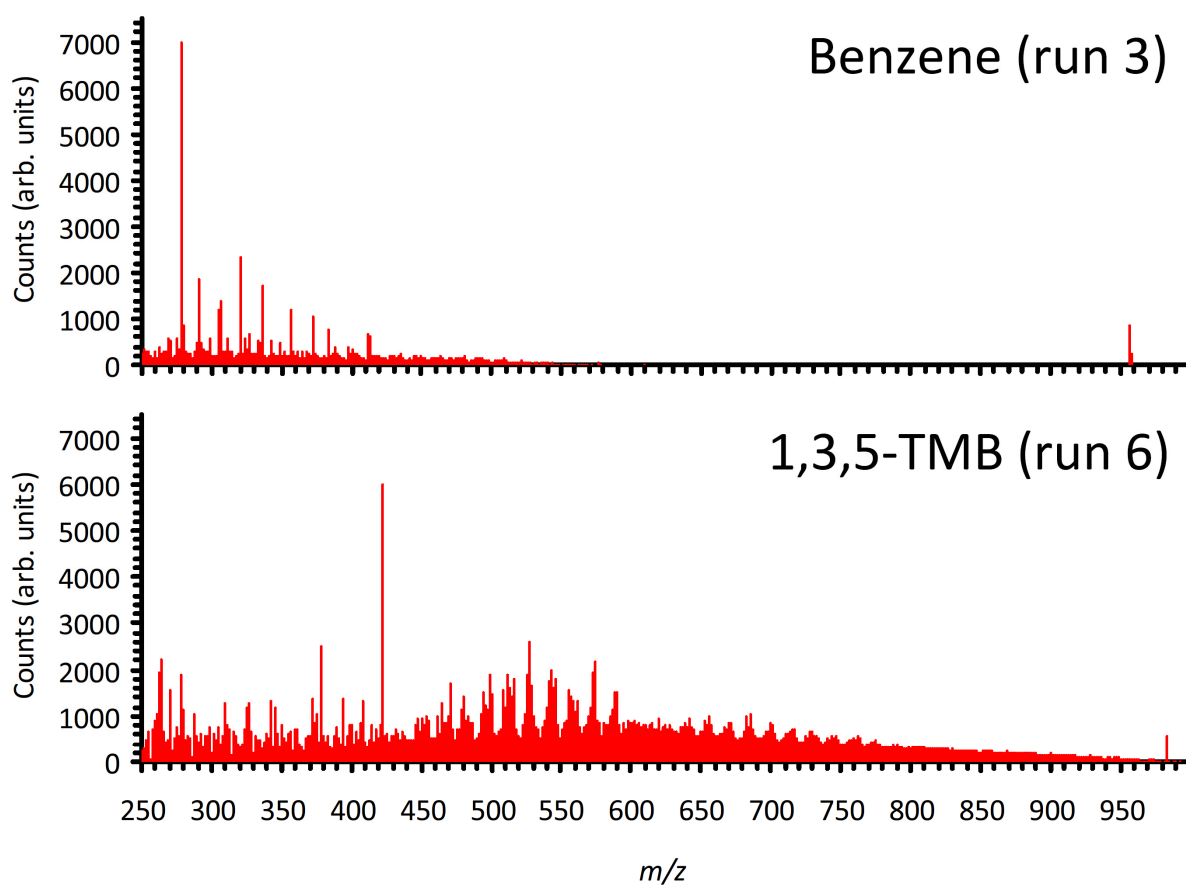

Fig. S3. Mass spectra measured by LC/TOF-MS for SOA from the photooxidation of benzene (run 3) and 1,3,5-TMB (run 6); the vertical axis is extended to show oligomer distributions; the signals in a region  $m/z < 250$  are higher than those in a region  $m/z > 250$  by a factor of  $\sim 10^2$ .

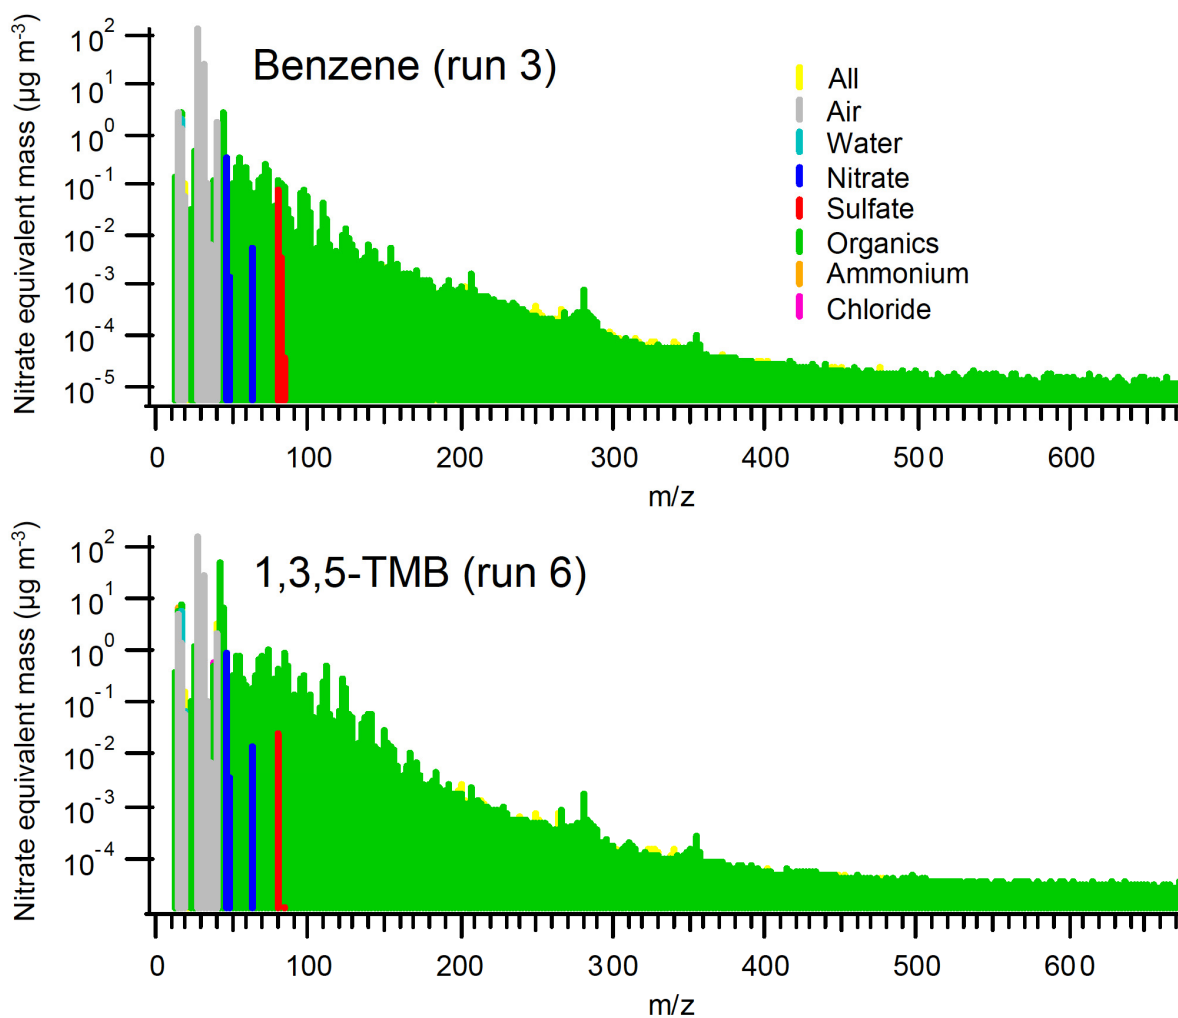

Fig. S4. Mass spectra measured by H-ToF-AMS for SOA from the photooxidation of benzene (run 3) and 1,3,5-TMB (run 6); peaks of  $m/z = 207, 281,$  and  $355$  were identified as  $\text{SiO}(\text{CH}_3)(\text{SiO}(\text{CH}_3)_2)_n^+$  ions ( $n = 2, 3,$  and  $4$ ) originated from silicone oil absorbed onto SOA particles (Timko et al., 2009); organic mass peaks in a region  $m/z$  200–600 except for the peaks of silicone oil are attributed to oligomers.

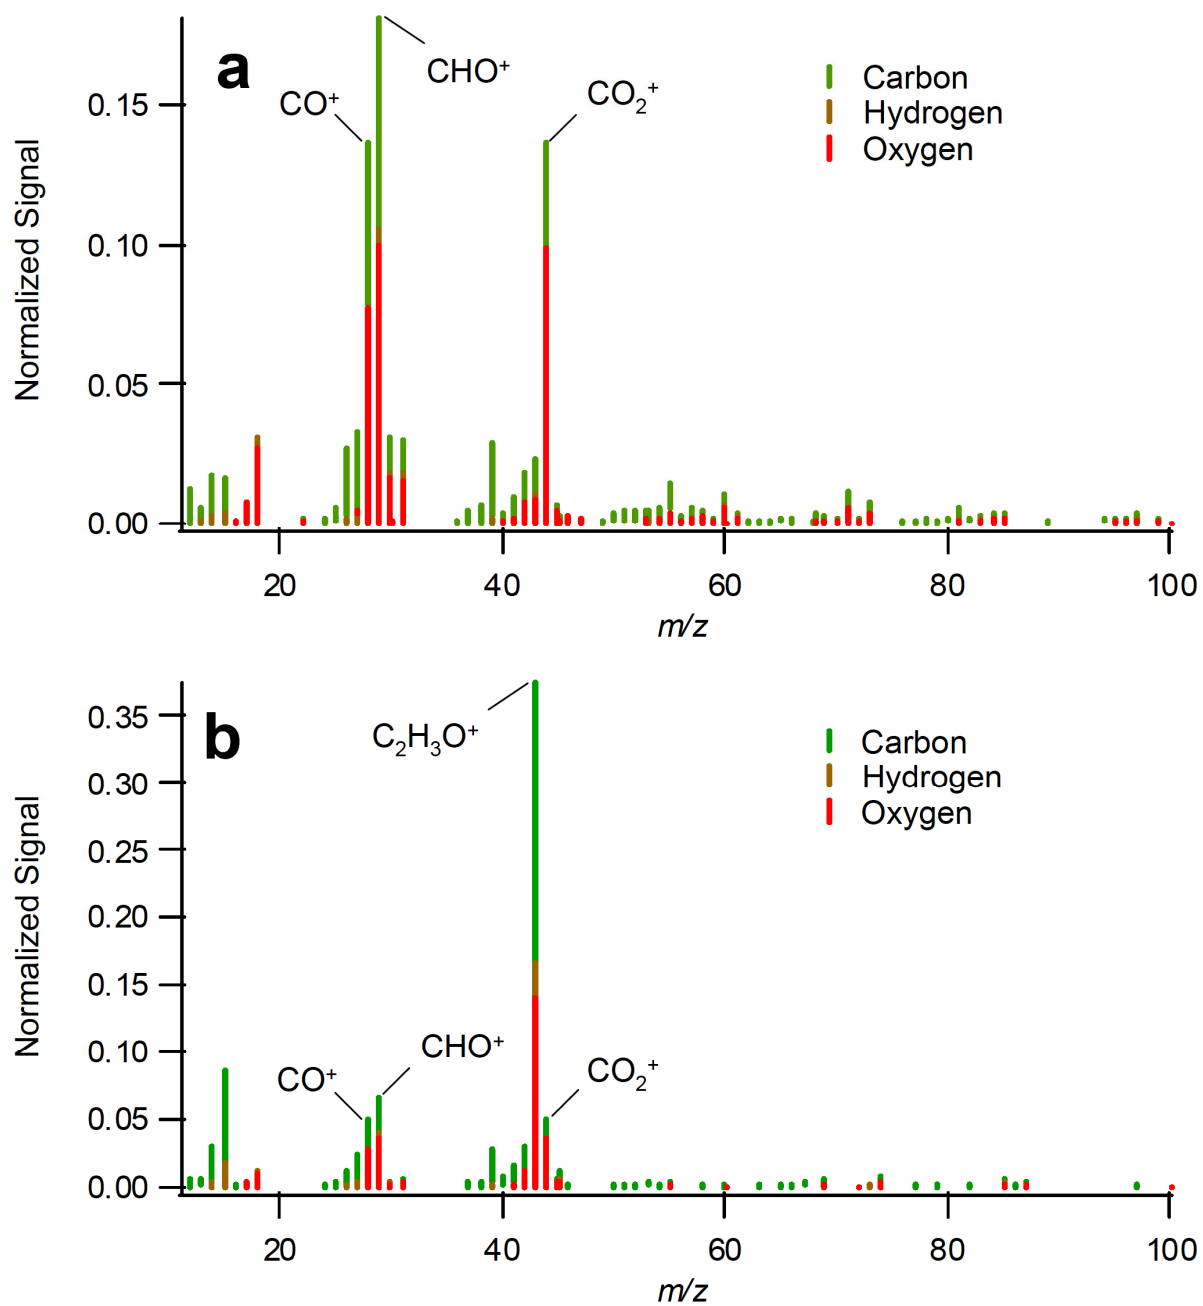

Fig. S5: Mass spectra measured by H-ToF-AMS for organic aerosol during the photooxidation of (a) benzene (run 3) and (b) 1,3,5-TMB (run 6); both spectra were obtained by averaging 4-hour data.

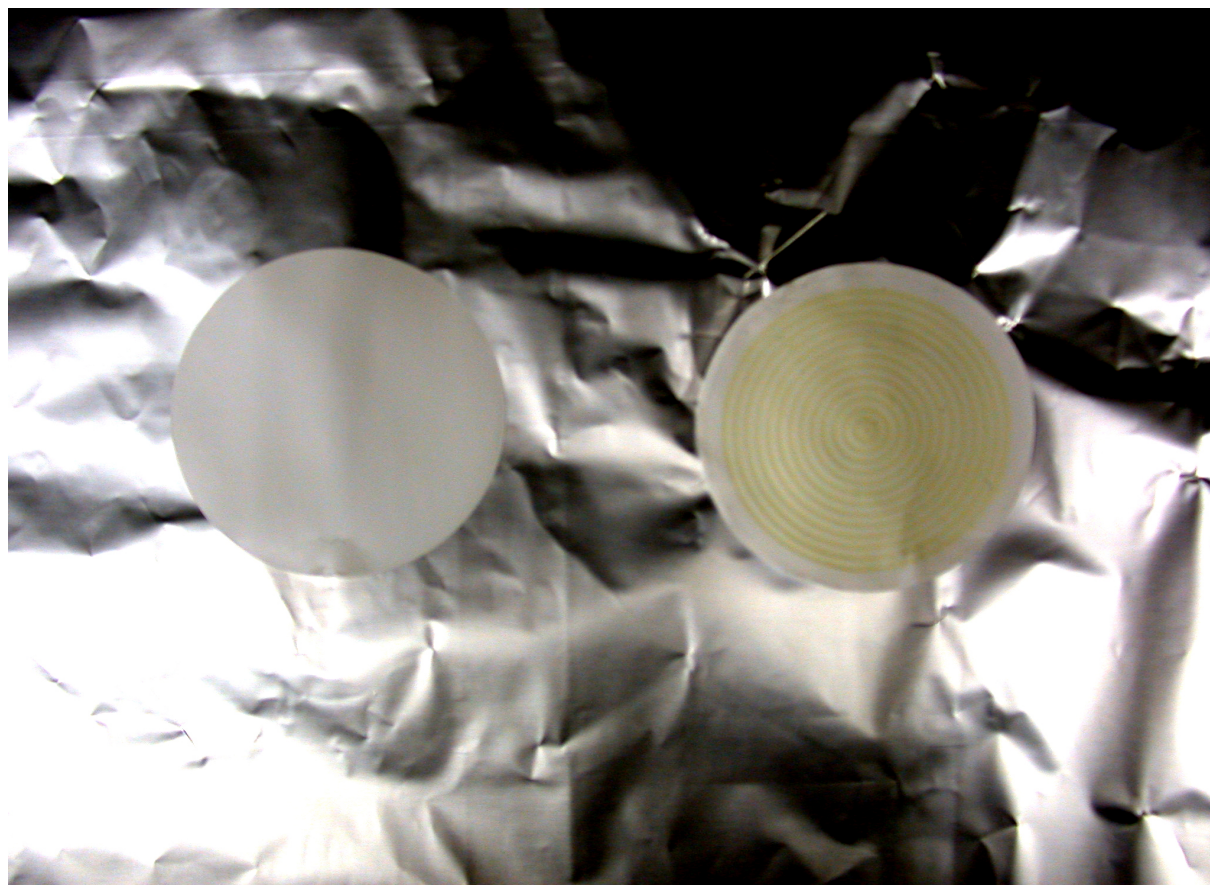

Photo. S1. Sample filter obtained in the experiment (run 3) with benzene (right) and blank filter (left); in contrast, a sample filter obtained in the experiment with 1,3,5-TMB was white.

## References

- Kleindienst, T. E., Smith, D. F., Li, W., Edney, E. O., Driscoll, D. J., Speer, R. E., Weathers, W. S., Secondary organic aerosol formation from the oxidation of aromatic hydrocarbons in the presence of dry submicron ammonium sulfate aerosol, *Atmos. Environ.*, 33, 3669-3681, 1999.
- Lane, T. E., Donahue, N. M., and Pandis, S. N.: Simulating secondary organic aerosol formation using the volatility basis-set approach in a chemical transport model, *Atmos. Environ.*, 42, 7439-7451, 2008.
- Martin-Reviejo, M. and Wirtz, K.: Is benzene a precursor for secondary organic aerosol?, *Environ. Sci. Technol.*, 39, 1045-1054, 2005.
- Ng, N. L., Kroll, J. H., Chan, A. H. W., Chhabra, P. S., Flagan, R. C., and Seinfeld, J. H.: Secondary organic aerosol formation from m-xylene, toluene, and benzene, *Atmos. Chem. Phys.*, 7, 3909-3922, 2007.
- Odum, J. R., Jungkamp, T. P. W., Griffin, R. J., Forstner, H. J. L., Flagan, R. C., and Seinfeld, J. H.: Aromatics, reformulated gasoline, and atmospheric organic aerosol formation, *Environ. Sci. Technol.*, 31, 1890-1897, 1997.
- Sato, K., Takami, A., Isozaki, T., Hikida, T., Shimono, A., and Imamura, T.: Mass spectrometric study of secondary organic aerosol formed from the photo-oxidation of aromatic hydrocarbons, *Atmos. Environ.*, 44, 1080-1087, 2010.
- Timko, M. T., Yu, Z., Kroll, J., Jayne, J. T., Worsnop, D. R., Miake-Lye, R. C., Onasch, T. B., Liscinsky, D., Kirchstetter, T. W., Destailats, H., Holder, A. L., Smith, J. D., and Wilson, K. R.: Sampling artifacts from conductive silicone tubing, *Aerosol Sci. Tech.*, 43, 855-865, 2009.
